# Supplementary material
Source: PubMed Central journal article supplement (PMC3820152)

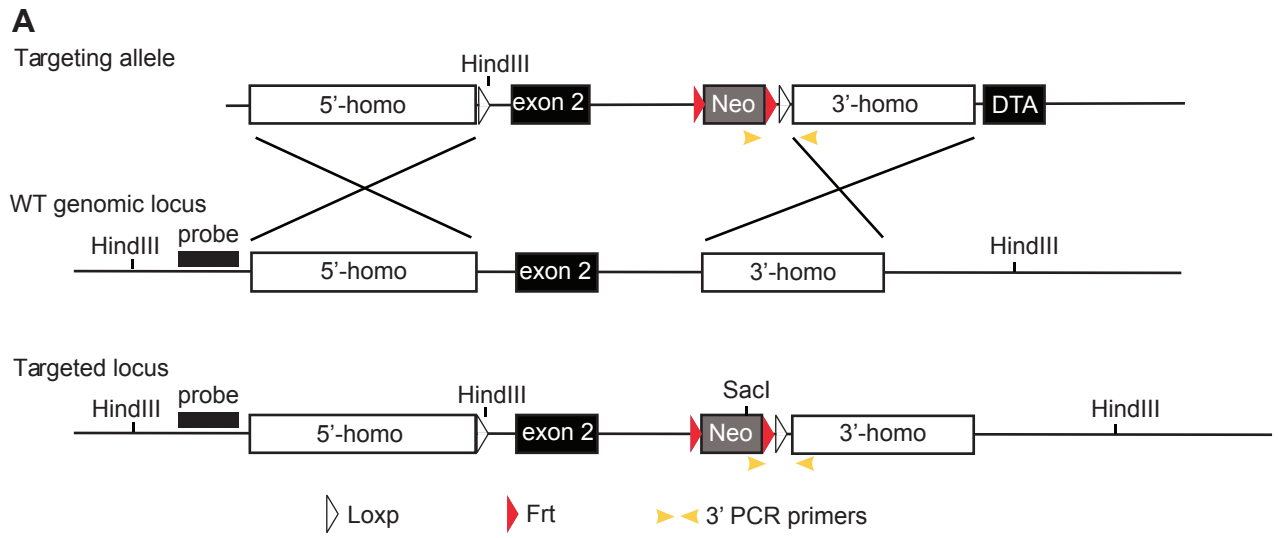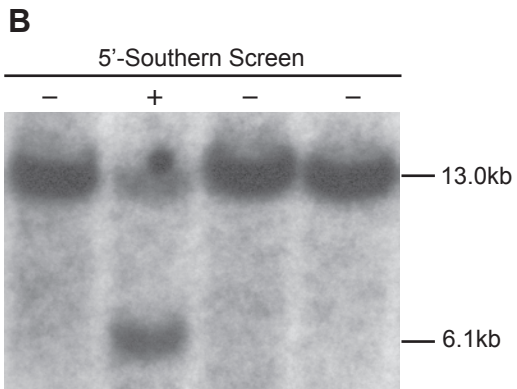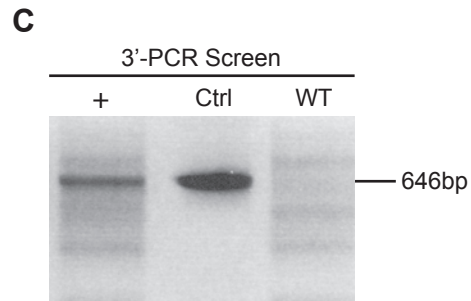

Figure S1

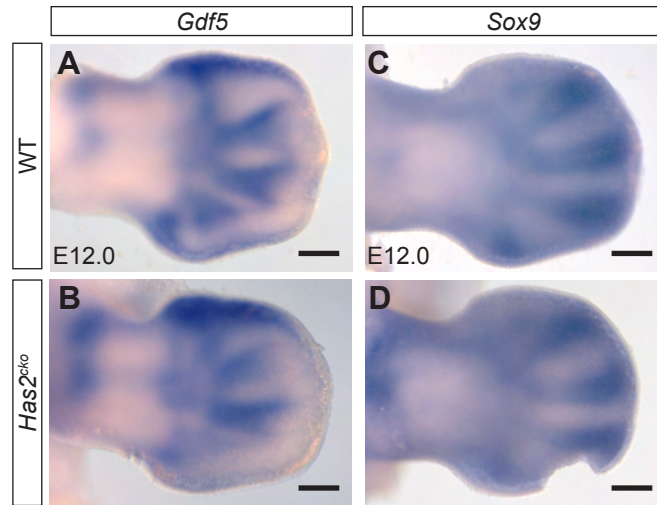

Figure S2

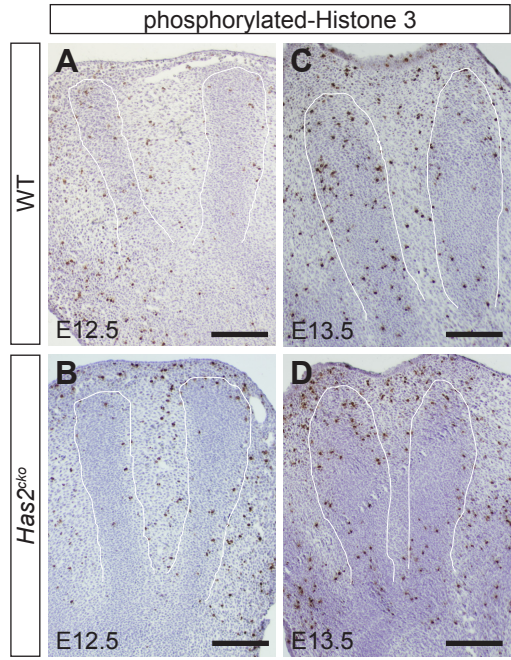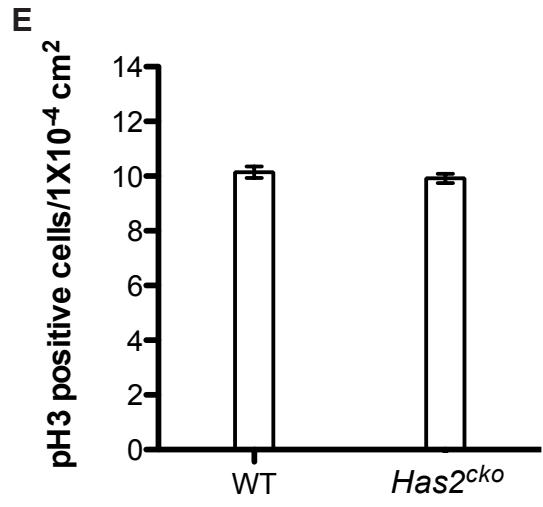

Figure S3

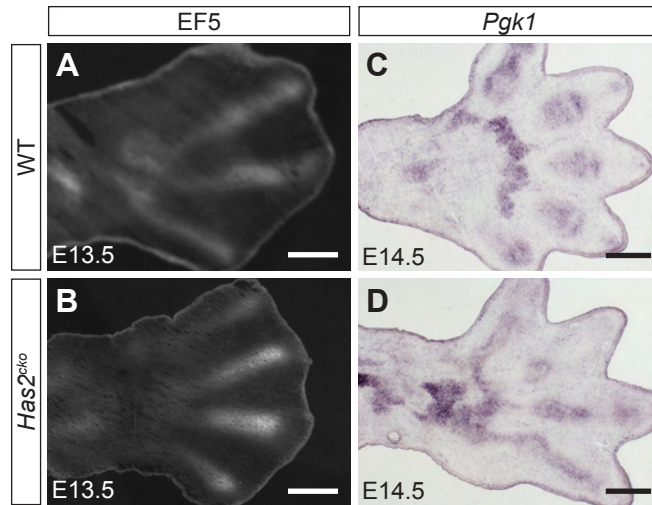

Figure S4

Supplement: NIHMS434533-supplement-01.pdf [file NIHMS434533-supplement-01.pdf]
